# Supplementary material for: Sex Differences in the Level of Homocysteine in Alzheimer’s Disease and Parkinson’s Disease Patients: A Meta-Analysis
Source: MDPI journal article supplement (doi:10.3390/brainsci13010153), 2023-01-15
Supplement: s1 [file s1]

Table S1: Search Terms

| Search Terms                                                                                                                                                                                                                                                                                                                           |
|----------------------------------------------------------------------------------------------------------------------------------------------------------------------------------------------------------------------------------------------------------------------------------------------------------------------------------------|
| <p>“sex*”, “gender*” “sex difference*” “gender difference*”, “sex characteristic*”, “gender characteristic*”, “dementia”, “alzheimer’s”, “cognitive deficit?”, “Cognitive impairment”, “cognitive decline”, “delirium”, “homocystein\$”, “homocystin\$”, “hyperhomocysteinemia”, “hyperhomocysteinaemia”, “hyperhomocyst?in?emi\$”</p> |
| <p>All search terms were performed with key words <b>.mp.</b> as multiple purposes for the title, abstract, subject heading, author keywords and other relevant information</p>                                                                                                                                                        |

Figure S1: Funnel plot evaluating publication bias across studies

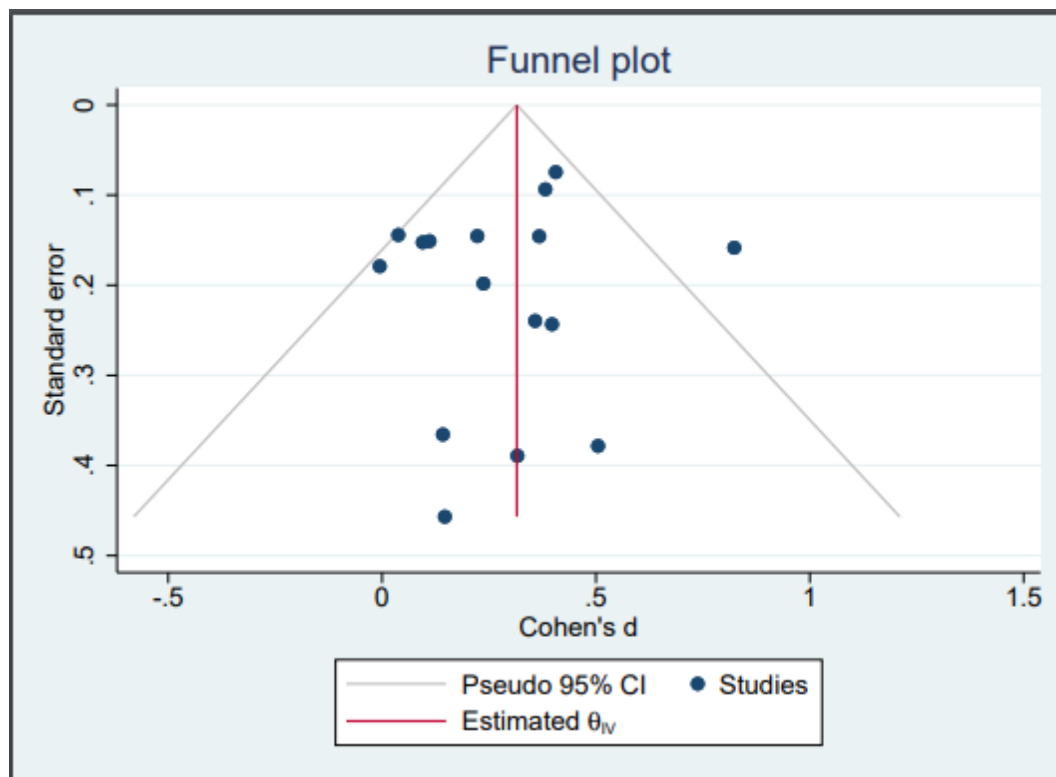

Figure S2: Egger's test results

```
H0: beta1 = 0; no small-study effects
      beta1 =      -0.23
      SE of beta1 =    0.742
              z =      -0.31
      Prob > |z| =    0.7600
```

.

Conclusion: No small- study effects,  $P = 0.76 > 0.05$ , low bias among studies
